# Supplementary material
Source: Royal Society of Chemistry journal article supplement (doi:10.1039/d6ta01181k)
Supplement: d6ta01181k1.pdf [file d6ta01181k1.pdf]

**Mechanistic Elucidation on the Detoxification of Hexavalent Chromium Using a Magnetic "Anion Sponge" Fe<sub>3</sub>O<sub>4</sub>-pC<sub>3</sub>N<sub>4</sub>/PANI Composite with Redox Capability: Experimental Design and Computational Study**

Abdelaziz IMGHARN<sup>a,b,\*</sup>, Ayoub CHAOU<sup>b</sup>, Asma GHOUMIT<sup>c</sup>, Mohammed ELHOUDI<sup>a</sup>, Redouane HAOUNATI<sup>d</sup>, Rahime Eshaghi MALEKSHAH<sup>e</sup>, Abdelghani HSINI<sup>f</sup>, Rabah BOUKHERROUB<sup>g</sup>, Chaker NECIBI<sup>a</sup>, Abdallah ALBOURINE<sup>b,h</sup>

<sup>a</sup> *International Water Research Institute (IWRI), Mohammed VI Polytechnic University, Ben Guerir 43150, Morocco*

<sup>b</sup> *Laboratory of Materials and Environment, Faculty of Sciences, Université Ibn Zohr, Agadir 80000, Morocco*

<sup>c</sup> *Research Group of Environmental and Inorganic Photochemistry, Center of Natural Science, Faculty of Engineering, University of Pannonia, P.O Box 158, H-8201 Veszprém, Hungary*

<sup>d</sup> *Nanomaterials, Technology and Innovation Group, ENS, Abdelmalek Essaadi University, Tetouan, Morocco*

<sup>e</sup> *Medical Biomaterial Research Centre (MBRC), Tehran University of Medical Sciences, Tehran, Iran*

<sup>f</sup> *National Higher School of Chemistry (NHSC), University Ibn Tofail, BP 133, 14000 Kenitra, Morocco*

<sup>g</sup> *Univ. Lille, CNRS, Univ. Polytechnique Hauts-de-France, UMR 8520 - IEMN, Lille F-59000, France*

<sup>h</sup> *Laboratory of Industrial Engineering, Energy and Environment (LI3E), SupMTI Rabat, Morocco*

\* Corresponding author: Abdelaziz IMGHARN

E-mail address: [abdelaziz.igharn@edu.uiz.ac.ma](mailto:abdelaziz.igharn@edu.uiz.ac.ma) (A. Imgharn)

## 2.4. Characterization of the adsorbent

The porosity of Fe<sub>3</sub>O<sub>4</sub>-pCN/PANI was evaluated by N<sub>2</sub> adsorption at -196 °C in a volumetric analyzer (Tristar, Micromeritics, Norcross, GA, USA). Before the experiments, the sample was outgassed at 120 °C for 12 h under vacuum.<sup>1</sup> The specific surface area (S<sub>BET</sub>), total pore volume (V<sub>total</sub>), and the micropore volume (V<sub>MICRO</sub>) were acquired from the gas adsorption data. The Fe<sub>3</sub>O<sub>4</sub>-pCN/PANI surface features were visualized by scanning electron microscopy (SEM) coupled with energy dispersive X-ray spectrometry (EDS) analysis (SEM, JEOL, JSM-IT200). Raman measurements were performed with a Witec Alpha 300 micro-Raman spectrometer equipped with a 532 nm incident laser light source releasing 5 mW. The point of zero-charge (PZC) of the Fe<sub>3</sub>O<sub>4</sub>-pCN/PANI sample was investigated by a similar potentiometric titration route reported in our previous work.<sup>2</sup> Following the addition of 0.03 g of the prepared adsorbent to 50 mL of KNO<sub>3</sub> (0.05 M) solution, the pH of the solution was adjusted from 2 to 12 by adding HCl (0.1 M) or NaOH (0.1 M) aqueous solution. During the 24 h stirring period, the mixtures were kept at an ambient temperature. The final pH<sub>f</sub> of each solution was measured. PZC is identified when ΔpH (pH<sub>f</sub> – pH<sub>initial</sub>) is equal zero. A PerkinElmer Nexion 350X inductively coupled plasma-mass spectrometer (ICP-MS) was used to measure total Cr concentrations in the solutions. Prior to analysis, samples were filtered through 0.45 μm filter to remove particulates, acidified with ultrapure HNO<sub>3</sub> (pH < 2) to stabilize dissolved metals, and diluted with deionized water to match the calibration range.

Thermogravimetric and differential thermoanalysis (TGA-DTA) were recorded on the Fe<sub>3</sub>O<sub>4</sub>-pCN/PANI from 25 to 900 °C using a TA instrument model (STA-1640). The crystal structures of the Fe<sub>3</sub>O<sub>4</sub>-pCN/PANI hybrid composite were assessed by X-ray powder diffraction (XRD) (BRUKER D8 ADVANCE TWIN diffractometer). X-ray

photoelectron spectroscopy (XPS) measurements of the prepared composite were carried out with an ESCALAB 220 XL spectrometer equipped with a monochromatic Al K $\alpha$  X-ray radiation source at 1486.6 eV. The binding energies were calibrated using the 284.8 eV peak of C 1s.

### 3.1. Characterization

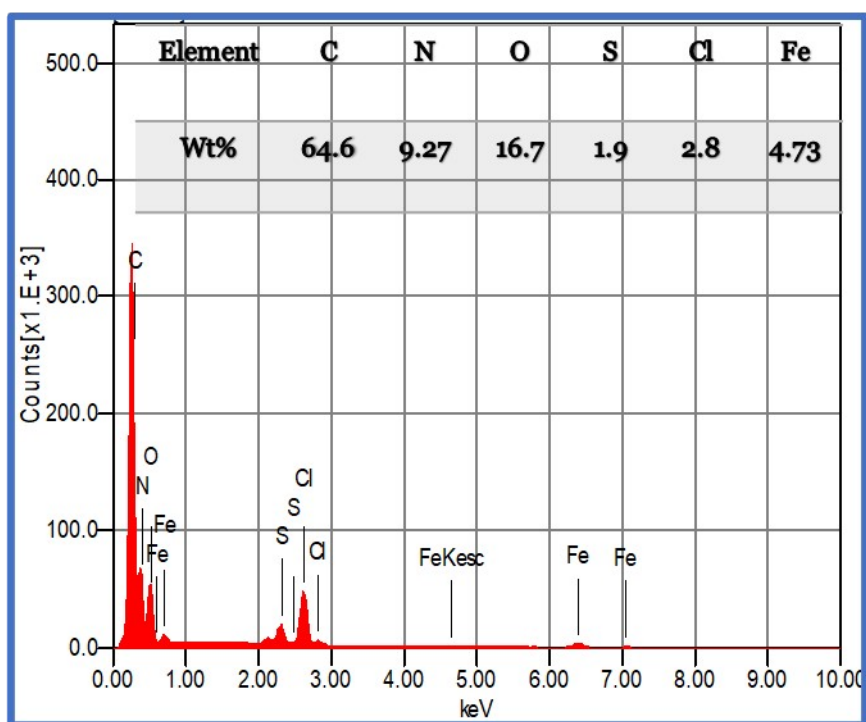

**Figure S1.** EDS elemental analysis of Fe<sub>3</sub>O<sub>4</sub>-pCN/PANI.

### 3.4. Adsorption experiments and probable mechanism – XPS analysis

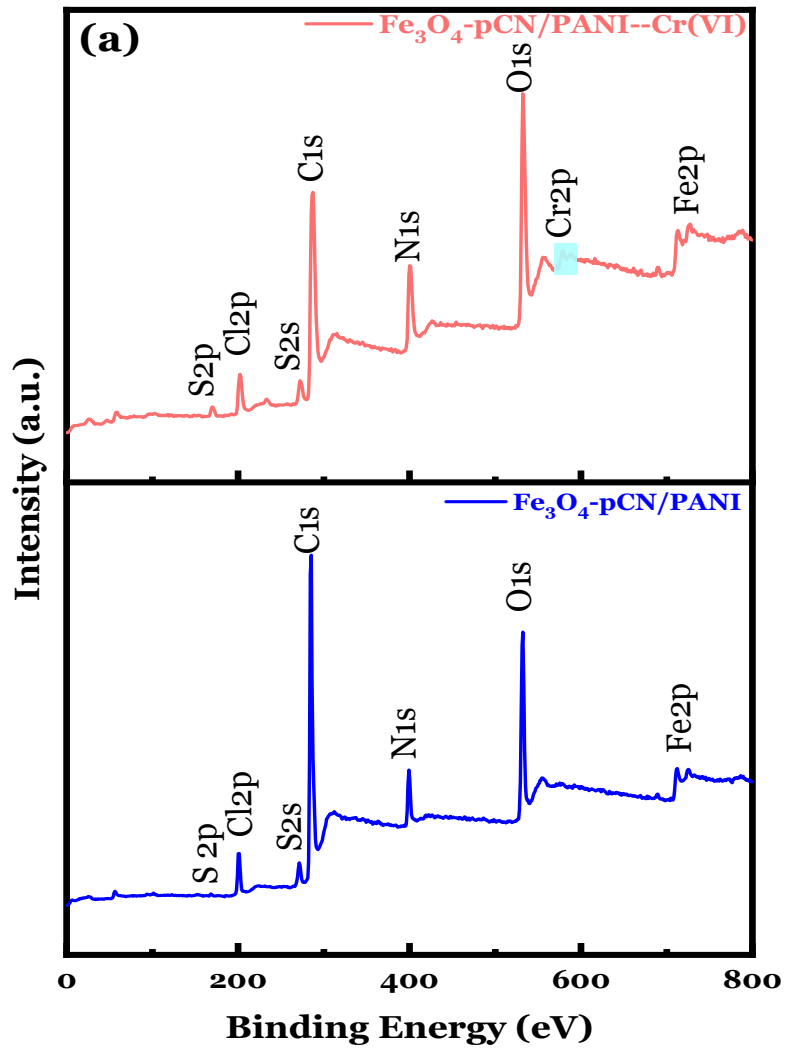

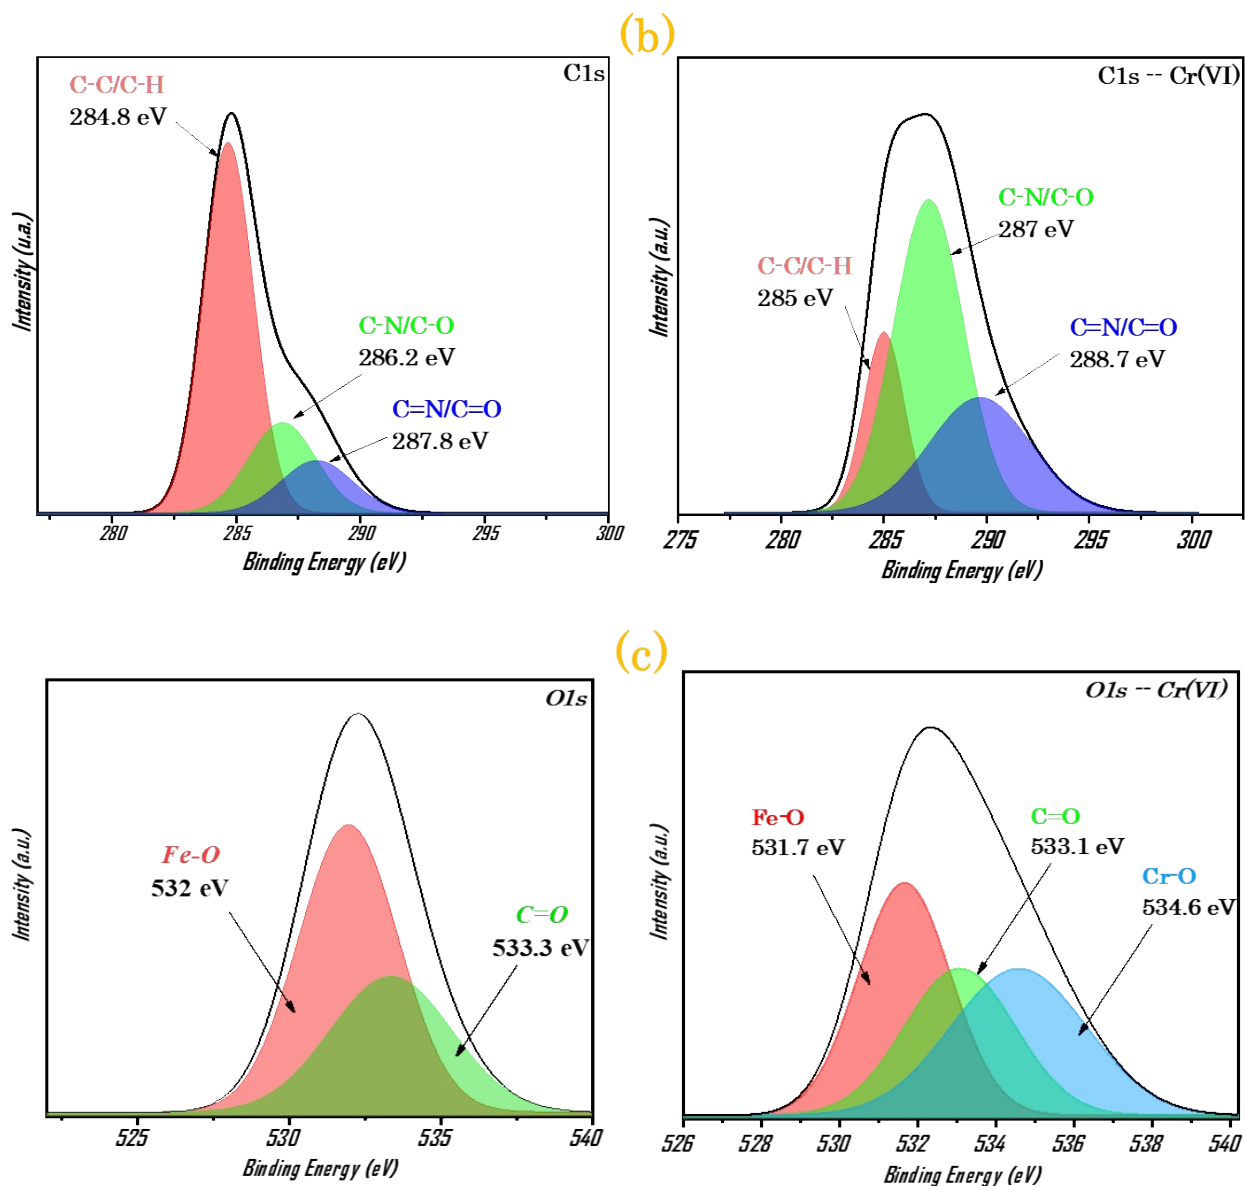

**Figure S2.** (a) XPS full scans, and high-resolution XPS spectra of (b) C1s and (c) O1s and of the Fe<sub>3</sub>O<sub>4</sub>-pCN/PANI composite before and after Cr(VI) adsorption.

**Table S1:** Elemental contents of samples based on XPS survey.

| Content (%)                                             | C     | O     | N     | Cl   | S    | Fe   | Cr   |
|---------------------------------------------------------|-------|-------|-------|------|------|------|------|
| Fe <sub>3</sub> O <sub>4</sub> -<br>pCN/PANI            | 49.39 | 28.96 | 8.84  | 7.01 | 0.62 | 5.18 | -    |
| Fe <sub>3</sub> O <sub>4</sub> -<br>pCN/PANI-<br>Cr(VI) | 33.56 | 38.03 | 13.40 | 6.63 | 1.80 | 3.34 | 3.24 |

**Table S2:** Elemental contents of samples based on XPS survey.

| Elements | Deconvolution                      | Before Cr (VI)<br>removal (%) | After Cr (VI)<br>removal (%) |
|----------|------------------------------------|-------------------------------|------------------------------|
| C 1S     | C-C/C-H                            | 70.84                         | 29.73                        |
|          | C-N/C-O                            | 18.75                         | 51.35                        |
|          | C=N/C=O                            | 10.41                         | 18.92                        |
| O 1S     | Fe-O                               | 67.79                         | 43.08                        |
|          | C=O                                | 32.21                         | 28.37                        |
|          | Cr-O                               | -                             | 28.55                        |
| N 1S     | =N-                                | 25.00                         | 23.38                        |
|          | N-H                                | 63.16                         | 51.94                        |
|          | =NH <sup>+</sup> -                 | 11.84                         | 24.68                        |
| Fe 2p    | Fe <sup>2+</sup> 2p <sub>3/2</sub> | 45.84                         | 24.81                        |
|          | Fe <sup>3+</sup> 2p <sub>3/2</sub> | 22.28                         | 31.25                        |
|          | Fe <sup>2+</sup> sat               | 3.26                          | 3.56                         |
|          | Fe <sup>2+</sup> 2p <sub>1/2</sub> | 15.94                         | 17.14                        |
|          | Fe <sup>3+</sup> 2p <sub>1/2</sub> | 7.37                          | 18.51                        |
|          | Fe <sup>2+</sup> sat               | 5.31                          | 4.73                         |
| Cr 2p    | Cr <sup>3+</sup> 2p <sub>3/2</sub> | -                             | 41.27                        |
|          | Cr <sup>6+</sup> 2p <sub>3/2</sub> | -                             | 39.68                        |
|          | Cr <sup>3+</sup> 2p <sub>1/2</sub> | -                             | 7.14                         |
|          | Cr <sup>6+</sup> 2p <sub>1/2</sub> | -                             | 11.91                        |

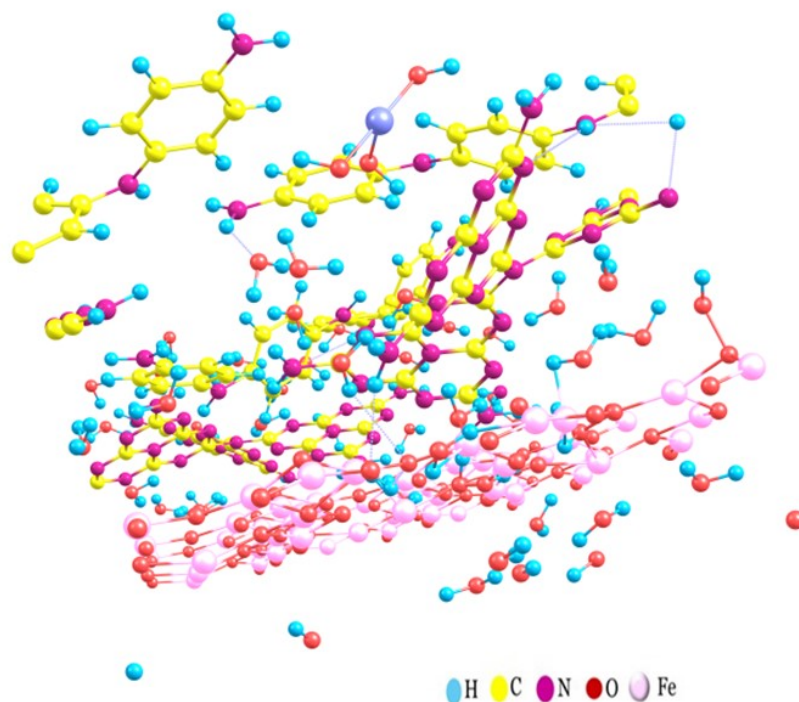

**Figure S3.** Equilibrium adsorption configurations of Cr(III) mediated by the  $\text{Fe}_3\text{O}_4(103)$ -pCN/PANI composite system.

## References

- (1) Imgharn, A.; Laabd, M.; Naciri, Y.; Hsini, A.; Mahir, F.-Z.; Zouggari, H.; Albourine, A. Insights into the Performance and Mechanism of PANI@Hydroxapatite-Montmorillonite for Hexavalent Chromium Cr (VI) Detoxification. *Surf. Interfaces* **2023**, *36*, 102568. <https://doi.org/10.1016/j.surfin.2022.102568>.
- (2) Chaoui, A.; Imgharn, A.; Estrada, A. C.; Hamou, A. B.; Farsad, S.; Nouj, N.; Ezzahery, M.; Trindade, T.; Albourine, A.; Alem, N. E. Chromium (VI) Remediation via Biochar@polyaniline Composite: Advancing Water Treatment Using Biogas Residue Digestate. *Adv. Compos. Hybrid Mater.* **2025**, *8* (4), 312. <https://doi.org/10.1007/s42114-025-01345-7>.
